# Supplementary material for: Environmental impact and magnitude of paleosol carbonate carbon isotope excursions marking five early Eocene hyperthermals in the Bighorn Basin, Wyoming
Source: Copernicus journal article supplement (doi:10.5194/cp-12-1151-2016), 2016-05-13
Supplement: Supplementary file 1 [file cp-12-1151-2016-supplement.pdf]

Supplement of *Clim. Past*, 12, 1151–1163, 2016  
<http://www.clim-past.net/12/1151/2016/>  
doi:10.5194/cp-12-1151-2016-supplement  
© Author(s) 2016. CC Attribution 3.0 License.

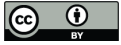

Climate  
of the Past

Open Access

The EGU logo features the letters 'EGU' in a bold, sans-serif font, with a circular arrow graphic behind the 'E'.

*Supplement of*

## **Environmental impact and magnitude of paleosol carbonate carbon isotope excursions marking five early Eocene hyperthermals in the Bighorn Basin, Wyoming**

**Hemmo A. Abels et al.**

*Correspondence to:* Hemmo A. Abels ([h.a.abels@tudelft.nl](mailto:h.a.abels@tudelft.nl))

The copyright of individual parts of the supplement might differ from the CC-BY 3.0 licence.

| MCP strat.pos. | $\delta^{13}\text{C}$ | Section |
|----------------|-----------------------|---------|
| 0.00           | -9.73                 | DCA     |
| 0.20           | -12.16                | DCA     |
| 1.20           | -9.41                 | DCA     |
| 1.60           | -9.64                 | DCA     |
| 1.80           | -9.15                 | DCA     |
| 2.00           | -9.10                 | DCA     |
| 2.40           | -9.44                 | DCA     |
| 3.80           | -10.64                | DCA     |
| 8.20           | -10.09                | DCA     |
| 9.00           | -11.27                | DCA     |
| 9.40           | -10.09                | DCA     |
| 9.80           | -9.86                 | DCA     |
| 10.00          | -9.55                 | DCA     |
| 12.40          | -9.13                 | DCA     |
| 12.60          | -9.71                 | DCA     |
| 12.80          | -9.19                 | DCA     |
| 13.00          | -9.78                 | DCA     |
| 14.60          | -11.03                | DCA     |
| 19.00          | -8.87                 | DCA     |
| 19.20          | -9.38                 | DCA     |
| 19.80          | -11.31                | DCA     |
| 20.20          | -9.16                 | DCA     |
| 20.40          | -9.98                 | DCA     |
| 21.00          | -10.02                | DCA     |
| 21.20          | -9.74                 | DCA     |
| 22.40          | -9.99                 | DCA     |
| 22.60          | -9.32                 | DCA     |
| 23.00          | -10.20                | DCA     |
| 23.20          | -9.38                 | DCA     |
| 23.40          | -8.99                 | DCA     |
| 23.60          | -9.00                 | DCA     |
| 23.80          | -9.42                 | DCA     |
| 24.00          | -9.39                 | DCA     |
| 24.20          | -9.76                 | DCA     |
| 24.40          | -9.71                 | DCA     |
| 27.20          | -10.29                | DCA     |
| 27.40          | -10.40                | DCA     |
| 27.60          | -10.81                | DCA     |
| 27.80          | -10.59                | DCA     |
| 28.00          | -10.31                | DCA     |
| 29.00          | -10.30                | DCA     |
| 31.80          | -14.22                | DCA     |
| 32.00          | -9.84                 | DCA     |
| 32.40          | -10.27                | DCA     |
| 33.00          | -10.43                | DCA     |

|       |        |     |
|-------|--------|-----|
| 33.20 | -10.08 | DCA |
| 33.40 | -10.54 | DCA |
| 33.60 | -10.39 | DCA |
| 33.80 | -10.38 | DCA |
| 34.00 | -10.09 | DCA |
| 34.20 | -10.04 | DCA |
| 35.00 | -10.32 | DCA |
| 35.20 | -9.24  | DCA |
| 35.80 | -9.12  | DCA |
| 38.60 | -10.26 | DCA |
| 38.80 | -10.71 | DCA |
| 39.40 | -10.30 | DCA |
| 40.00 | -10.35 | DCA |
| 40.20 | -10.59 | DCA |
| 40.40 | -11.37 | DCA |
| 41.00 | -10.45 | DCA |
| 42.40 | -10.14 | DCA |
| 42.60 | -10.33 | DCA |
| 42.80 | -7.63  | DCA |
| 43.00 | -10.45 | DCA |
| 43.20 | -10.89 | DCA |
| 43.60 | -10.57 | DCA |
| 43.80 | -10.74 | DCA |
| 44.80 | -9.35  | DCA |
| 45.00 | -10.15 | DCA |
| 45.40 | -11.89 | DCA |
| 46.00 | -9.54  | DCA |
| 46.80 | -7.97  | DCA |
| 47.00 | -9.08  | DCA |
| 48.40 | -12.96 | DCA |
| 49.40 | -10.77 | DCA |
| 49.60 | -9.98  | DCA |
| 50.20 | -9.41  | DCA |
| 50.60 | -9.56  | DCA |
| 51.00 | -9.51  | DCA |
| 51.20 | -9.48  | DCA |
| 52.20 | -10.16 | DCA |
| 52.40 | -9.50  | DCA |
| 53.80 | -10.32 | DCA |
| 59.40 | -11.09 | DCA |
| 62.20 | -10.41 | DCA |
| 62.60 | -10.18 | DCA |
| 62.80 | -10.36 | DCA |
| 63.60 | -10.81 | DCA |
| 64.40 | -10.23 | DCA |
| 64.80 | -10.87 | DCA |

|       |        |     |
|-------|--------|-----|
| 66.20 | -10.19 | DCA |
| 69.20 | -9.35  | DCA |
| 69.60 | -9.76  | DCA |
| 69.80 | -9.57  | DCA |
| 70.00 | -9.48  | DCA |
| 70.20 | -9.81  | DCA |
| 70.40 | -10.12 | DCA |
| 70.60 | -10.32 | DCA |
| 70.80 | -10.62 | DCA |
| 71.60 | -9.93  | DCA |
| 72.60 | -9.97  | DCA |
| 72.86 | -8.70  | CSH |
| 73.00 | -9.93  | DCA |
| 73.20 | -9.33  | CSH |
| 73.60 | -10.60 | DCA |
| 74.60 | -9.62  | DCA |
| 75.12 | -9.11  | CSH |
| 76.67 | -9.98  | CSH |
| 77.01 | -9.42  | CSH |
| 77.19 | -9.49  | CSH |
| 77.36 | -10.08 | CSH |
| 77.54 | -9.53  | CSH |
| 77.80 | -9.90  | DCA |
| 80.40 | -10.81 | DCA |
| 81.00 | -10.49 | DCA |
| 81.20 | -11.21 | DCA |
| 81.40 | -10.87 | DCA |
| 82.76 | -9.56  | CSH |
| 83.04 | -9.79  | CSH |
| 83.25 | -9.79  | CSH |
| 83.40 | -9.88  | DCA |
| 83.43 | -9.72  | CSH |
| 83.60 | -9.60  | CSH |
| 83.94 | -9.56  | CSH |
| 83.94 | -9.50  | CSH |
| 84.29 | -9.45  | CSH |
| 84.40 | -9.99  | DCA |
| 84.47 | -9.48  | CSH |
| 84.63 | -8.55  | CSH |
| 84.98 | -9.40  | CSH |
| 85.16 | -9.23  | CSH |
| 85.33 | -10.32 | CSH |
| 85.51 | -10.50 | CSH |
| 85.67 | -11.83 | CSH |
| 86.02 | -10.36 | CSH |
| 86.20 | -9.84  | CSH |

|        |        |     |
|--------|--------|-----|
| 86.37  | -10.50 | CSH |
| 86.55  | -10.05 | CSH |
| 86.71  | -10.40 | CSH |
| 87.00  | -10.27 | DCA |
| 87.06  | -10.30 | CSH |
| 87.40  | -9.62  | CSH |
| 87.80  | -10.58 | DCA |
| 88.62  | -10.51 | CSH |
| 89.48  | -9.74  | CSH |
| 89.60  | -10.20 | DCA |
| 91.20  | -10.40 | DCA |
| 91.40  | -10.18 | DCA |
| 91.60  | -10.25 | DCA |
| 91.80  | -10.21 | DCA |
| 91.91  | -10.67 | CSH |
| 92.25  | -10.45 | CSH |
| 93.20  | -9.82  | DCA |
| 93.40  | -9.34  | DCA |
| 93.60  | -9.52  | DCA |
| 93.82  | -11.45 | CSH |
| 95.02  | -11.07 | CSH |
| 95.20  | -10.45 | CSH |
| 95.55  | -10.24 | CSH |
| 96.20  | -9.89  | DCA |
| 96.20  | -9.94  | DCA |
| 97.10  | -10.54 | CSH |
| 97.28  | -10.57 | CSH |
| 97.45  | -10.49 | CSH |
| 97.63  | -10.40 | CSH |
| 97.80  | -11.53 | CSH |
| 98.00  | -10.68 | DCA |
| 98.14  | -10.95 | CSH |
| 98.60  | -9.96  | DCA |
| 98.67  | -9.19  | CSH |
| 98.80  | -9.30  | DCA |
| 99.11  | -10.20 | CSH |
| 99.39  | -10.04 | CSH |
| 99.67  | -10.19 | CSH |
| 99.80  | -10.80 | CSH |
| 100.60 | -9.58  | DCA |
| 100.80 | -10.76 | DCA |
| 101.00 | -9.07  | DCA |
| 101.20 | -9.75  | DCA |
| 101.40 | -10.26 | DCA |
| 101.60 | -9.31  | DCA |
| 102.71 | -8.86  | CSH |

|        |        |     |
|--------|--------|-----|
| 102.85 | -9.74  | CSH |
| 103.20 | -10.72 | DCA |
| 104.58 | -9.72  | CSH |
| 104.79 | -9.65  | CSH |
| 104.93 | -9.61  | CSH |
| 105.07 | -9.60  | CSH |
| 105.60 | -9.43  | DCA |
| 106.80 | -8.85  | CSH |
| 106.98 | -9.97  | CSH |
| 107.56 | -8.86  | CSH |
| 107.84 | -8.77  | CSH |
| 108.00 | -9.50  | DCA |
| 108.05 | -9.62  | CSH |
| 108.40 | -9.58  | DCA |
| 108.60 | -9.58  | DCA |
| 109.00 | -8.98  | DCA |
| 110.19 | -10.04 | CSH |
| 110.33 | -9.88  | CSH |
| 110.47 | -9.64  | CSH |
| 110.68 | -9.29  | CSH |
| 110.89 | -9.32  | CSH |
| 111.09 | -10.07 | CSH |
| 111.51 | -8.97  | CSH |
| 111.60 | -10.11 | DCA |
| 111.65 | -9.71  | CSH |
| 111.86 | -9.69  | CSH |
| 112.20 | -9.73  | DCA |
| 114.40 | -9.76  | DCA |
| 115.40 | -9.61  | DCA |
| 115.60 | -9.76  | DCA |
| 115.80 | -9.83  | DCA |
| 116.00 | -9.63  | DCA |
| 116.40 | -10.24 | DCA |
| 117.00 | -9.79  | DCA |
| 118.76 | -9.88  | CSH |
| 119.06 | -9.70  | CSH |
| 119.20 | -9.69  | CSH |
| 119.79 | -10.62 | CSH |
| 121.14 | -9.06  | CSH |
| 121.28 | -8.85  | CSH |
| 121.83 | -8.85  | CSH |
| 122.52 | -9.84  | CSH |
| 126.89 | -10.57 | CSH |
| 127.07 | -9.82  | CSH |
| 127.58 | -10.43 | CSH |
| 127.79 | -10.14 | CSH |

|        |        |     |
|--------|--------|-----|
| 127.93 | -9.99  | CSH |
| 128.62 | -10.18 | CSH |
| 128.80 | -10.08 | CSH |
| 129.15 | -9.49  | CSH |
| 129.31 | -9.82  | CSH |
| 129.84 | -9.02  | CSH |
| 130.18 | -10.01 | CSH |
| 130.84 | -9.69  | CSH |
| 130.97 | -9.55  | CSH |
| 131.39 | -9.86  | CSH |
| 131.67 | -9.38  | CSH |
| 132.43 | -9.70  | CSH |
| 132.78 | -9.52  | CSH |
| 132.96 | -9.50  | CSH |
| 133.12 | -9.88  | CSH |
| 133.30 | -9.34  | CSH |
| 133.47 | -9.41  | CSH |
| 133.65 | -10.08 | CSH |
| 134.16 | -10.85 | CSH |
| 134.44 | -10.66 | CSH |
| 134.51 | -8.49  | CSH |
| 134.78 | -10.80 | CSH |
| 135.03 | -9.11  | CSH |
| 137.35 | -9.78  | CSH |
| 139.70 | -10.99 | CSH |
| 140.40 | -10.37 | CSH |
| 140.53 | -10.70 | CSH |
| 141.09 | -10.03 | CSH |
| 141.27 | -9.86  | CSH |
| 141.61 | -9.77  | CSH |
| 141.96 | -9.50  | CSH |
| 142.47 | -9.48  | CSH |
| 142.75 | -9.49  | CSH |
| 142.82 | -10.09 | CSH |
| 143.00 | -9.38  | CSH |
| 143.35 | -9.89  | CSH |
| 143.51 | -9.94  | CSH |
| 143.69 | -9.43  | CSH |
| 143.72 | -9.97  | CSH |
| 144.04 | -9.76  | CSH |
| 144.27 | -9.95  | CSH |
| 144.48 | -10.05 | CSH |
| 144.83 | -9.91  | CSH |
| 144.97 | -10.12 | CSH |
| 145.24 | -10.21 | CSH |
| 145.59 | -10.87 | CSH |

|        |        |     |
|--------|--------|-----|
| 145.77 | -11.84 | CSH |
| 145.94 | -11.94 | CSH |
| 146.63 | -10.09 | CSH |
| 147.16 | -11.00 | CSH |
| 147.67 | -11.38 | CSH |
| 148.36 | -11.96 | CSH |
| 148.89 | -10.06 | CSH |
| 149.12 | -9.90  | CSH |
| 149.40 | -9.16  | CSH |
| 149.68 | -9.57  | CSH |
| 155.03 | -10.77 | UDC |
| 156.37 | -8.98  | UDC |
| 156.56 | -9.29  | UDC |
| 157.60 | -9.37  | UDC |
| 157.70 | -9.22  | UDC |
| 158.46 | -9.46  | UDC |
| 159.03 | -9.52  | UDC |
| 161.32 | -9.74  | UDC |
| 161.51 | -9.55  | UDC |
| 162.08 | -9.72  | UDC |
| 162.13 | -9.44  | UDC |
| 162.36 | -9.78  | UDC |
| 162.46 | -9.25  | UDC |
| 162.65 | -9.67  | UDC |
| 163.60 | -10.71 | UDC |
| 163.79 | -10.92 | UDC |
| 167.03 | -10.60 | UDC |
| 167.12 | -10.33 | UDC |
| 167.22 | -9.44  | UDC |
| 167.41 | -10.70 | UDC |
| 167.79 | -10.58 | UDC |
| 167.88 | -10.88 | UDC |
| 168.17 | -10.48 | UDC |
| 168.23 | -11.38 | UDC |
| 168.36 | -10.70 | UDC |
| 169.12 | -11.07 | UDC |
| 169.41 | -14.29 | UDC |
| 169.50 | -10.63 | UDC |
| 170.83 | -10.29 | UDC |
| 171.02 | -9.78  | UDC |
| 171.21 | -10.36 | UDC |
| 171.27 | -10.26 | UDC |
| 171.40 | -10.28 | UDC |
| 171.59 | -10.30 | UDC |
| 171.69 | -10.28 | UDC |
| 171.78 | -10.21 | UDC |



|        |        |     |
|--------|--------|-----|
| 171.88 | -10.13 | UDC |
| 171.98 | -9.95  | UDC |
| 173.12 | -10.78 | UDC |
| 173.69 | -10.35 | UDC |
| 174.17 | -10.32 | CSH |
| 174.52 | -10.17 | CSH |
| 174.68 | -10.03 | CSH |
| 174.86 | -9.73  | CSH |
| 175.21 | -9.89  | UDC |
| 175.40 | -10.23 | UDC |
| 175.59 | -9.70  | UDC |
| 175.97 | -9.15  | UDC |
| 176.35 | -9.80  | UDC |
| 176.54 | -9.65  | UDC |
| 176.76 | -9.30  | CSH |
| 176.94 | -9.90  | CSH |
| 177.63 | -11.47 | CSH |
| 178.07 | -9.93  | UDC |
| 178.26 | -9.78  | UDC |
| 178.45 | -10.18 | UDC |
| 178.54 | -9.75  | UDC |
| 178.73 | -9.80  | UDC |
| 178.83 | -10.09 | UDC |
| 178.88 | -9.99  | UDC |
| 179.02 | -9.87  | UDC |
| 179.71 | -10.95 | CSH |
| 180.84 | -10.26 | WBS |
| 181.10 | -9.74  | WBS |
| 181.59 | -10.88 | UDC |
| 181.68 | -10.70 | UDC |
| 181.96 | -10.89 | CSH |
| 182.11 | -9.55  | WBS |
| 182.14 | -10.63 | CSH |
| 182.25 | -11.20 | UDC |
| 182.44 | -9.44  | WBS |
| 182.63 | -10.80 | UDC |
| 182.83 | -10.40 | UDC |
| 183.02 | -11.26 | UDC |
| 183.02 | -9.74  | WBS |
| 183.11 | -10.95 | UDC |
| 183.21 | -10.55 | UDC |
| 183.23 | -9.47  | WBS |
| 183.38 | -12.84 | WBS |
| 183.40 | -11.07 | UDC |
| 183.45 | -11.40 | WBS |
| 183.59 | -10.72 | UDC |

|        |        |     |
|--------|--------|-----|
| 183.63 | -12.32 | WBS |
| 183.68 | -11.42 | UDC |
| 183.78 | -11.17 | UDC |
| 184.14 | -9.73  | WBS |
| 184.46 | -10.28 | WBS |
| 184.73 | -9.22  | UDC |
| 184.90 | -10.63 | WBS |
| 184.92 | -10.35 | UDC |
| 185.11 | -10.80 | UDC |
| 185.20 | -9.47  | UDC |
| 185.30 | -9.39  | UDC |
| 187.20 | -9.89  | UDC |
| 187.33 | -12.44 | CSH |
| 187.58 | -10.34 | UDC |
| 187.64 | -12.46 | CSH |
| 187.77 | -12.61 | CSH |
| 188.44 | -10.63 | UDC |
| 189.30 | -11.39 | UDC |
| 189.97 | -11.92 | WBS |
| 190.44 | -12.49 | UDC |
| 190.45 | -12.78 | CSH |
| 190.63 | -13.34 | UDC |
| 190.73 | -13.25 | WBS |
| 190.99 | -13.82 | WBS |
| 191.39 | -12.64 | UDC |
| 191.39 | -12.92 | UDC |
| 191.44 | -12.31 | WBS |
| 191.58 | -13.03 | UDC |
| 191.77 | -13.66 | UDC |
| 191.96 | -12.83 | UDC |
| 192.12 | -12.34 | WBS |
| 192.25 | -12.33 | WBS |
| 192.34 | -13.42 | UDC |
| 192.46 | -12.42 | WBS |
| 192.53 | -14.58 | CSH |
| 192.53 | -14.10 | UDC |
| 192.71 | -12.44 | WBS |
| 192.72 | -13.84 | UDC |
| 192.91 | -14.07 | UDC |
| 193.39 | -14.09 | CSH |
| 193.48 | -12.23 | UDC |
| 193.52 | -12.82 | WBS |
| 193.57 | -13.66 | CSH |
| 193.59 | -13.65 | WBS |
| 193.65 | -13.21 | WBS |
| 193.68 | -12.93 | UDC |

|        |        |     |
|--------|--------|-----|
| 193.73 | -13.91 | CSH |
| 194.08 | -14.48 | CSH |
| 194.40 | -13.63 | WBS |
| 194.63 | -13.37 | UDC |
| 194.79 | -13.87 | WBS |
| 194.95 | -14.00 | CSH |
| 195.04 | -13.76 | WBS |
| 195.10 | -13.46 | UDC |
| 195.20 | -14.22 | UDC |
| 195.30 | -13.85 | WBS |
| 195.46 | -14.11 | CSH |
| 195.58 | -14.82 | UDC |
| 195.77 | -13.97 | UDC |
| 195.96 | -14.07 | UDC |
| 196.15 | -13.77 | UDC |
| 196.18 | -13.17 | CSH |
| 196.31 | -12.45 | WBS |
| 196.34 | -13.89 | CSH |
| 196.50 | -13.53 | CSH |
| 196.53 | -13.51 | UDC |
| 196.63 | -14.28 | UDC |
| 196.72 | -13.67 | UDC |
| 196.82 | -12.63 | WBS |
| 196.91 | -13.61 | UDC |
| 197.07 | -12.84 | WBS |
| 197.33 | -12.68 | WBS |
| 197.46 | -13.64 | WBS |
| 198.43 | -13.51 | UDC |
| 198.58 | -12.93 | CSH |
| 199.10 | -13.04 | CSH |
| 199.44 | -13.74 | CSH |
| 199.86 | -12.91 | WBS |
| 200.18 | -11.27 | WBS |
| 200.67 | -14.05 | CSH |
| 200.67 | -13.45 | CSH |
| 201.00 | -13.24 | CSH |
| 201.11 | -12.71 | WBS |
| 201.23 | -13.93 | CSH |
| 201.37 | -11.57 | WBS |
| 201.62 | -13.78 | WBS |
| 201.68 | -14.38 | CSH |
| 201.68 | -13.55 | CSH |
| 201.79 | -13.43 | CSH |
| 202.12 | -12.89 | WBS |
| 202.12 | -13.04 | CSH |
| 202.12 | -13.29 | UDC |

|        |        |     |
|--------|--------|-----|
| 202.37 | -12.64 | WBS |
| 202.46 | -13.38 | CSH |
| 203.08 | -12.36 | UDC |
| 203.14 | -13.17 | CSH |
| 203.24 | -13.40 | CSH |
| 204.03 | -11.59 | UDC |
| 204.35 | -12.61 | UDC |
| 204.99 | -12.40 | UDC |
| 205.31 | -11.35 | UDC |
| 205.60 | -11.19 | CSH |
| 205.70 | -11.58 | WBS |
| 205.71 | -11.09 | CSH |
| 205.93 | -11.08 | CSH |
| 206.07 | -11.22 | CSH |
| 206.15 | -11.85 | WBS |
| 206.29 | -11.38 | CSH |
| 206.30 | -11.71 | WBS |
| 206.43 | -10.73 | CSH |
| 206.58 | -11.22 | WBS |
| 206.59 | -11.37 | CSH |
| 207.02 | -11.03 | WBS |
| 207.02 | -11.31 | CSH |
| 207.11 | -10.63 | UDC |
| 207.17 | -10.92 | CSH |
| 207.18 | -10.88 | WBS |
| 207.75 | -10.66 | CSH |
| 208.02 | -11.18 | WBS |
| 208.05 | -11.01 | CSH |
| 208.24 | -11.00 | UDC |
| 208.48 | -11.19 | CSH |
| 209.51 | -10.17 | CSH |
| 209.80 | -10.77 | CSH |
| 210.52 | -9.95  | UDC |
| 210.52 | -10.64 | CSH |
| 210.71 | -10.19 | WBS |
| 210.80 | -12.01 | UDC |
| 210.82 | -11.57 | CSH |
| 210.99 | -11.06 | CSH |
| 211.19 | -10.36 | WBS |
| 211.26 | -10.25 | CSH |
| 211.40 | -10.60 | CSH |
| 211.43 | -10.39 | WBS |
| 211.67 | -10.14 | WBS |
| 211.94 | -9.59  | UDC |
| 213.62 | -10.65 | UDC |
| 213.77 | -11.45 | WBS |

|        |        |     |
|--------|--------|-----|
| 213.92 | -10.69 | CSH |
| 214.74 | -10.85 | CSH |
| 214.95 | -11.13 | CSH |
| 214.97 | -11.51 | UDC |
| 215.06 | -10.59 | WBS |
| 215.24 | -11.42 | UDC |
| 215.28 | -10.98 | WBS |
| 215.49 | -10.86 | WBS |
| 215.51 | -11.35 | UDC |
| 215.56 | -10.67 | CSH |
| 215.82 | -10.66 | WBS |
| 215.92 | -11.05 | WBS |
| 216.03 | -10.80 | WBS |
| 216.04 | -11.75 | UDC |
| 216.14 | -10.83 | WBS |
| 216.31 | -11.35 | UDC |
| 216.36 | -11.08 | WBS |
| 216.58 | -10.82 | UDC |
| 216.68 | -11.06 | WBS |
| 217.11 | -10.79 | WBS |
| 217.66 | -13.02 | UDC |
| 218.23 | -11.00 | CSH |
| 218.43 | -11.49 | CSH |
| 218.64 | -11.15 | CSH |
| 218.84 | -11.07 | CSH |
| 218.87 | -11.31 | UDC |
| 219.26 | -11.24 | WBS |
| 219.81 | -12.29 | UDC |
| 219.91 | -12.41 | WBS |
| 220.01 | -12.40 | WBS |
| 220.21 | -12.00 | UDC |
| 220.23 | -12.03 | WBS |
| 220.53 | -11.95 | UDC |
| 220.62 | -12.02 | UDC |
| 220.70 | -12.07 | UDC |
| 220.93 | -12.98 | WBS |
| 221.20 | -12.52 | UDC |
| 221.37 | -12.57 | UDC |
| 221.38 | -12.35 | WBS |
| 221.45 | -13.33 | UDC |
| 221.53 | -12.92 | UDC |
| 221.70 | -13.02 | UDC |
| 221.82 | -12.14 | WBS |
| 222.16 | -11.07 | CSH |
| 222.36 | -10.61 | CSH |
| 222.66 | -11.03 | CSH |

|        |        |     |
|--------|--------|-----|
| 222.71 | -12.66 | WBS |
| 222.86 | -10.91 | CSH |
| 223.06 | -11.73 | CSH |
| 223.15 | -12.63 | WBS |
| 223.26 | -12.17 | CSH |
| 223.37 | -12.80 | WBS |
| 223.47 | -11.73 | CSH |
| 223.57 | -11.60 | CSH |
| 223.77 | -12.19 | CSH |
| 224.04 | -12.85 | WBS |
| 224.07 | -12.12 | CSH |
| 224.27 | -12.12 | CSH |
| 224.47 | -12.09 | CSH |
| 224.68 | -12.78 | CSH |
| 224.87 | -12.71 | UDC |
| 224.95 | -12.96 | UDC |
| 224.98 | -12.41 | CSH |
| 225.03 | -12.80 | UDC |
| 225.08 | -12.32 | CSH |
| 225.28 | -12.19 | CSH |
| 225.37 | -13.05 | UDC |
| 225.37 | -13.26 | WBS |
| 225.39 | -12.04 | CSH |
| 225.48 | -12.11 | CSH |
| 225.59 | -12.52 | CSH |
| 225.59 | -15.76 | WBS |
| 225.68 | -12.81 | CSH |
| 225.89 | -11.42 | CSH |
| 226.03 | -11.95 | UDC |
| 226.04 | -12.46 | WBS |
| 226.20 | -12.20 | UDC |
| 226.26 | -12.76 | WBS |
| 226.37 | -12.25 | UDC |
| 226.87 | -12.22 | UDC |
| 227.03 | -11.74 | UDC |
| 227.45 | -12.55 | UDC |
| 227.50 | -13.42 | CSH |
| 227.61 | -13.30 | CSH |
| 227.81 | -12.92 | CSH |
| 227.91 | -13.00 | CSH |
| 227.93 | -12.45 | UDC |
| 228.02 | -12.91 | CSH |
| 228.12 | -11.94 | CSH |
| 228.22 | -12.44 | CSH |
| 228.32 | -11.99 | CSH |
| 228.43 | -12.12 | CSH |

|        |        |     |
|--------|--------|-----|
| 228.64 | -11.89 | CSH |
| 228.72 | -12.38 | WBS |
| 228.89 | -11.72 | WBS |
| 228.94 | -12.55 | CSH |
| 228.97 | -12.12 | WBS |
| 229.06 | -11.29 | WBS |
| 229.14 | -11.62 | WBS |
| 229.22 | -12.03 | WBS |
| 229.25 | -12.66 | CSH |
| 229.35 | -13.18 | CSH |
| 229.46 | -13.01 | CSH |
| 229.56 | -12.56 | CSH |
| 229.87 | -12.63 | CSH |
| 229.90 | -12.81 | WBS |
| 229.99 | -12.95 | WBS |
| 230.07 | -13.10 | WBS |
| 230.24 | -13.26 | WBS |
| 230.28 | -12.25 | CSH |
| 230.38 | -12.33 | CSH |
| 230.41 | -13.23 | WBS |
| 230.58 | -10.05 | WBS |
| 230.75 | -9.55  | WBS |
| 231.59 | -11.29 | WBS |
| 231.62 | -12.67 | CSH |
| 231.72 | -11.75 | CSH |
| 231.82 | -12.69 | CSH |
| 232.18 | -11.66 | WBS |
| 232.44 | -12.06 | CSH |
| 232.64 | -11.87 | CSH |
| 233.11 | -11.62 | WBS |
| 233.28 | -12.03 | WBS |
| 233.58 | -12.29 | CSH |
| 233.67 | -12.15 | CSH |
| 233.70 | -12.08 | WBS |
| 233.78 | -12.38 | CSH |
| 233.79 | -11.54 | WBS |
| 233.88 | -11.95 | CSH |
| 233.96 | -11.41 | WBS |
| 233.99 | -11.84 | CSH |
| 234.09 | -11.74 | CSH |
| 234.69 | -11.01 | WBS |
| 234.93 | -11.07 | UDC |
| 234.97 | -11.13 | CSH |
| 235.14 | -10.92 | CSH |
| 235.48 | -10.93 | UDC |
| 235.50 | -11.74 | CSH |

|        |        |     |
|--------|--------|-----|
| 235.69 | -11.67 | CSH |
| 235.86 | -11.42 | CSH |
| 236.01 | -11.45 | CSH |
| 236.22 | -11.62 | CSH |
| 236.31 | -10.52 | UDC |
| 236.58 | -11.60 | CSH |
| 237.13 | -11.54 | CSH |
| 237.69 | -11.16 | UDC |
| 237.74 | -10.85 | CSH |
| 237.80 | -10.83 | WBS |
| 238.02 | -10.47 | CSH |
| 238.24 | -10.21 | WBS |
| 238.25 | -11.03 | UDC |
| 238.38 | -10.97 | CSH |
| 238.46 | -10.88 | CSH |
| 238.52 | -10.59 | UDC |
| 238.74 | -10.90 | CSH |
| 238.80 | -10.03 | UDC |
| 239.08 | -10.38 | UDC |
| 239.47 | -11.10 | CSH |
| 239.83 | -11.48 | CSH |
| 240.18 | -10.67 | UDC |
| 240.37 | -11.30 | CSH |
| 241.35 | -10.42 | WBS |
| 241.45 | -9.85  | CSH |
| 241.57 | -10.19 | WBS |
| 242.03 | -9.78  | CSH |
| 242.50 | -9.80  | WBS |
| 243.78 | -10.46 | CSH |
| 243.95 | -9.66  | UDC |
| 244.00 | -9.83  | WBS |
| 244.25 | -10.73 | CSH |
| 244.33 | -10.34 | UDC |
| 244.53 | -9.90  | CSH |
| 244.58 | -10.15 | UDC |
| 244.83 | -10.79 | UDC |
| 244.88 | -9.94  | WBS |
| 245.08 | -9.91  | UDC |
| 245.50 | -10.08 | WBS |
| 245.58 | -10.06 | UDC |
| 245.78 | -9.84  | CSH |
| 246.08 | -10.03 | UDC |
| 246.15 | -9.66  | CSH |
| 246.53 | -10.00 | CSH |
| 246.58 | -10.21 | UDC |
| 246.75 | -10.42 | WBS |



|        |        |     |
|--------|--------|-----|
| 246.78 | -10.01 | CSH |
| 246.83 | -10.41 | UDC |
| 247.00 | -9.44  | WBS |
| 247.08 | -10.34 | UDC |
| 247.33 | -9.57  | UDC |
| 247.40 | -10.45 | CSH |
| 247.50 | -9.47  | WBS |
| 247.65 | -10.05 | CSH |
| 247.75 | -9.69  | WBS |
| 248.13 | -9.34  | WBS |
| 248.25 | -9.76  | WBS |
| 248.45 | -9.96  | CSH |
| 248.50 | -10.28 | WBS |
| 248.65 | -10.00 | CSH |
| 248.75 | -9.68  | WBS |
| 248.78 | -9.67  | CSH |
| 248.83 | -10.41 | UDC |
| 248.90 | -9.55  | CSH |
| 249.08 | -9.74  | UDC |
| 249.13 | -9.83  | WBS |
| 249.15 | -10.24 | CSH |
| 249.28 | -9.98  | CSH |
| 249.50 | -10.48 | WBS |
| 249.75 | -10.32 | WBS |
| 249.88 | -10.18 | WBS |
| 250.00 | -10.26 | WBS |
| 250.25 | -10.43 | WBS |
| 250.58 | -10.80 | UDC |
| 250.75 | -10.23 | WBS |
| 250.78 | -9.92  | CSH |
| 251.00 | -9.31  | WBS |
| 251.38 | -9.91  | WBS |
| 251.50 | -9.36  | WBS |
| 251.58 | -11.11 | UDC |
| 251.63 | -9.44  | WBS |
| 251.75 | -9.20  | WBS |
| 251.88 | -8.95  | WBS |
| 252.00 | -10.04 | WBS |
| 252.15 | -10.25 | CSH |
| 252.25 | -10.42 | CSH |
| 252.25 | -8.93  | WBS |
| 252.33 | -9.91  | UDC |
| 252.35 | -10.09 | CSH |
| 252.38 | -8.98  | WBS |
| 253.00 | -10.57 | WBS |
| 253.33 | -10.04 | UDC |

|        |        |     |
|--------|--------|-----|
| 253.75 | -9.64  | WBS |
| 254.33 | -9.86  | UDC |
| 254.58 | -9.75  | UDC |
| 254.75 | -9.88  | WBS |
| 254.78 | -10.58 | CSH |
| 254.88 | -9.05  | WBS |
| 255.25 | -9.69  | WBS |
| 255.28 | -10.88 | CSH |
| 255.38 | -9.95  | WBS |
| 255.58 | -9.73  | UDC |
| 255.70 | -10.53 | CSH |
| 255.75 | -9.74  | WBS |
| 256.20 | -9.88  | UDC |
| 256.33 | -9.91  | UDC |
| 256.63 | -9.90  | WBS |
| 256.83 | -10.69 | UDC |
| 257.15 | -9.79  | CSH |
| 257.25 | -9.74  | WBS |
| 257.28 | -9.48  | CSH |
| 257.38 | -9.80  | WBS |
| 257.40 | -10.87 | CSH |
| 257.50 | -10.16 | WBS |
| 257.63 | -10.67 | WBS |
| 257.75 | -10.20 | WBS |
| 258.00 | -10.24 | WBS |
| 258.13 | -9.92  | WBS |
| 258.25 | -9.86  | WBS |
| 258.95 | -11.42 | UDC |
| 259.15 | -10.14 | CSH |
| 259.40 | -9.95  | CSH |
| 259.75 | -12.06 | WBS |
| 260.33 | -11.05 | UDC |
| 260.50 | -12.02 | WBS |
| 260.75 | -11.92 | WBS |
| 260.78 | -11.69 | CSH |
| 260.88 | -12.07 | WBS |
| 260.90 | -11.86 | CSH |
| 261.00 | -13.69 | WBS |
| 261.13 | -11.89 | WBS |
| 261.50 | -11.74 | WBS |
| 261.83 | -11.95 | UDC |
| 262.00 | -8.21  | WBS |
| 262.33 | -10.32 | UDC |
| 262.75 | -10.61 | WBS |
| 262.88 | -10.28 | WBS |
| 263.00 | -10.46 | WBS |

|        |        |     |
|--------|--------|-----|
| 263.25 | -10.75 | WBS |
| 263.38 | -10.43 | WBS |
| 263.50 | -6.26  | WBS |
| 263.83 | -10.37 | UDC |
| 264.08 | -10.18 | UDC |
| 264.63 | -9.47  | WBS |
| 264.83 | -10.22 | UDC |
| 265.25 | -9.78  | WBS |
| 265.83 | -10.49 | UDC |
| 266.75 | -10.73 | WBS |
| 266.88 | -10.33 | WBS |
| 267.00 | -9.71  | WBS |
| 267.58 | -11.52 | UDC |
| 267.75 | -10.21 | WBS |
| 268.00 | -10.07 | WBS |
| 268.13 | -10.30 | WBS |
| 268.25 | -10.25 | WBS |
| 268.28 | -10.19 | CSH |
| 268.40 | -10.45 | CSH |
| 268.50 | -9.71  | WBS |
| 268.53 | -10.19 | CSH |
| 268.75 | -10.73 | WBS |
| 269.15 | -9.78  | CSH |
| 269.40 | -10.25 | CSH |
| 269.50 | -12.18 | WBS |
| 269.75 | -10.02 | WBS |
| 269.83 | -9.26  | UDC |
| 270.08 | -9.30  | UDC |
| 270.13 | -9.80  | WBS |
| 270.25 | -9.46  | WBS |
| 270.38 | -9.79  | WBS |
| 270.50 | -10.18 | WBS |
| 270.60 | -10.22 | CSH |
| 270.63 | -9.99  | WBS |
| 270.78 | -9.93  | CSH |
| 270.83 | -9.40  | UDC |
| 270.88 | -10.02 | WBS |
| 271.00 | -9.85  | WBS |
| 271.08 | -9.62  | UDC |
| 271.13 | -9.86  | WBS |
| 271.25 | -9.58  | WBS |
| 271.33 | -9.84  | UDC |
| 271.38 | -9.38  | WBS |
| 271.58 | -9.50  | UDC |
| 271.65 | -9.97  | CSH |
| 271.75 | -9.44  | WBS |

|        |        |     |
|--------|--------|-----|
| 271.80 | -9.90  | CSH |
| 271.90 | -9.70  | CSH |
| 272.33 | -12.08 | UDC |
| 272.58 | -9.08  | UDC |
| 272.75 | -10.74 | WBS |
| 272.83 | -9.78  | UDC |
| 273.00 | -10.68 | WBS |
| 273.25 | -10.60 | WBS |
| 273.50 | -10.14 | WBS |
| 273.58 | -10.33 | UDC |
| 273.75 | -10.81 | WBS |
| 274.00 | -10.30 | WBS |
| 274.63 | -9.03  | WBS |
| 274.75 | -8.69  | WBS |
| 275.00 | -9.47  | WBS |
| 278.00 | -10.52 | WBS |
| 278.13 | -10.13 | WBS |
| 278.25 | -10.67 | WBS |
| 278.38 | -9.38  | WBS |
| 278.50 | -9.78  | WBS |
| 278.63 | -10.01 | WBS |
| 278.75 | -9.86  | WBS |
| 279.00 | -10.11 | WBS |
| 281.00 | -10.05 | WBS |
| 281.25 | -9.69  | WBS |
| 282.50 | -10.36 | WBS |
| 283.25 | -10.72 | WBS |
| 283.50 | -10.32 | WBS |
| 284.00 | -10.42 | WBS |
| 284.25 | -10.70 | WBS |
| 284.38 | -10.75 | WBS |
| 284.50 | -10.66 | WBS |
| 285.50 | -10.43 | WBS |
| 285.75 | -10.04 | WBS |
| 286.25 | -9.95  | WBS |
| 291.75 | -10.45 | WBS |
| 293.13 | -10.68 | WBS |
| 293.75 | -10.79 | WBS |
| 294.13 | -9.41  | WBS |
| 294.25 | -9.74  | WBS |
| 295.00 | -10.59 | WBS |
| 295.38 | -9.25  | WBS |
| 295.88 | -8.96  | WBS |
| 296.00 | -8.83  | WBS |
| 296.25 | -9.32  | WBS |
| 296.75 | -9.50  | WBS |

|        |        |     |
|--------|--------|-----|
| 296.88 | -9.17  | WBS |
| 297.00 | -8.65  | WBS |
| 297.13 | -9.22  | WBS |
| 297.25 | -9.59  | WBS |
| 297.38 | -9.57  | WBS |
| 300.75 | -9.57  | WBS |
| 301.00 | -8.98  | WBS |
| 303.00 | -11.69 | WBS |
| 303.25 | -12.37 | WBS |
| 303.38 | -11.90 | WBS |
| 303.88 | -11.24 | WBS |
| 304.00 | -11.20 | WBS |
| 304.75 | -11.16 | WBS |
| 308.00 | -12.33 | WBS |
| 308.50 | -12.45 | WBS |
| 308.75 | -11.98 | WBS |
| 309.00 | -12.18 | WBS |
| 309.13 | -12.51 | WBS |
| 309.25 | -12.66 | WBS |
| 309.50 | -11.87 | WBS |
| 309.75 | -12.30 | WBS |
| 309.88 | -12.20 | WBS |
| 310.00 | -12.50 | WBS |
| 310.25 | -12.96 | WBS |
| 311.38 | -12.81 | WBS |
| 312.00 | -12.32 | WBS |
| 312.13 | -11.96 | WBS |
| 313.00 | -12.28 | WBS |
| 313.13 | -12.48 | WBS |
| 313.25 | -12.14 | WBS |
| 313.38 | -12.29 | WBS |
| 313.50 | -12.70 | WBS |
| 313.63 | -12.54 | WBS |
| 313.75 | -12.48 | WBS |
| 315.50 | -12.73 | WBS |
| 315.63 | -13.16 | WBS |
| 315.75 | -12.10 | WBS |
| 317.25 | -11.80 | WBS |
| 317.38 | -11.49 | WBS |
| 318.25 | -11.75 | WBS |
| 318.38 | -11.75 | WBS |
| 318.50 | -12.16 | WBS |
| 318.88 | -11.16 | WBS |
| 319.00 | -11.02 | WBS |
| 319.13 | -10.81 | WBS |
| 319.25 | -10.84 | WBS |

|        |        |     |
|--------|--------|-----|
| 320.25 | -11.45 | WBS |
| 321.88 | -12.60 | WBS |
| 322.00 | -12.36 | WBS |
| 322.25 | -11.34 | WBS |
| 323.50 | -11.10 | WBS |
| 323.75 | -12.09 | WBS |
| 324.13 | -11.38 | WBS |
| 324.50 | -11.65 | WBS |
| 324.63 | -10.96 | WBS |
| 324.75 | -11.64 | WBS |
| 325.00 | -11.51 | WBS |
| 325.50 | -11.64 | WBS |
| 325.75 | -10.91 | WBS |
| 325.88 | -11.99 | WBS |
| 326.13 | -11.51 | WBS |
| 326.25 | -11.10 | WBS |
| 327.25 | -11.02 | WBS |
| 327.75 | -10.43 | WBS |
| 328.25 | -11.75 | WBS |
| 328.75 | -10.97 | WBS |
| 328.88 | -11.65 | WBS |
| 329.13 | -10.97 | WBS |
| 329.25 | -10.74 | WBS |
| 329.38 | -9.97  | WBS |
| 329.50 | -11.21 | WBS |
| 329.63 | -10.54 | WBS |
| 329.88 | -10.59 | WBS |
| 330.00 | -10.50 | WBS |
| 330.13 | -10.41 | WBS |
| 330.25 | -10.69 | WBS |
| 330.63 | -10.15 | WBS |
| 330.75 | -10.13 | WBS |
| 331.38 | -9.92  | WBS |
| 331.63 | -9.15  | WBS |
| 332.38 | -10.09 | WBS |
| 332.63 | -9.74  | WBS |
| 332.75 | -9.85  | WBS |
| 336.00 | -9.28  | WBS |
| 336.75 | -9.43  | WBS |
| 336.88 | -9.69  | WBS |
| 337.00 | -9.41  | WBS |
| 338.00 | -10.62 | WBS |
| 338.25 | -10.49 | WBS |
| 338.50 | -10.34 | WBS |
| 339.00 | -10.81 | WBS |
| 339.75 | -11.00 | WBS |

|        |        |     |
|--------|--------|-----|
| 340.00 | -10.54 | WBS |
| 340.88 | -11.11 | WBS |
| 340.88 | -11.05 | WBS |
| 341.00 | -11.35 | WBS |
| 341.00 | -11.70 | WBS |
| 343.25 | -11.22 | WBS |
| 343.50 | -11.46 | WBS |
| 345.00 | -11.17 | WBS |
| 345.75 | -11.19 | WBS |
| 346.13 | -10.96 | WBS |
| 346.38 | -10.45 | WBS |
| 346.50 | -11.38 | WBS |
| 346.75 | -11.63 | WBS |
| 347.00 | -10.58 | WBS |
| 347.25 | -10.98 | WBS |
| 349.50 | -11.76 | WBS |
| 349.75 | -11.38 | WBS |
| 350.25 | -10.13 | WBS |
| 350.75 | -11.75 | WBS |
| 351.00 | -12.21 | WBS |
| 351.25 | -11.26 | WBS |
| 351.50 | -10.87 | WBS |
| 351.75 | -11.71 | WBS |
| 352.00 | -11.35 | WBS |
| 352.25 | -11.04 | WBS |
| 352.88 | -11.47 | WBS |
| 353.00 | -12.64 | WBS |
| 353.25 | -10.92 | WBS |
| 353.75 | -11.88 | WBS |
| 358.75 | -9.79  | WBS |
| 359.25 | -9.53  | WBS |
| 359.50 | -9.65  | WBS |
| 361.00 | -9.20  | WBS |
| 361.13 | -9.81  | WBS |
| 362.50 | -11.55 | WBS |
| 362.63 | -10.86 | WBS |
| 363.38 | -10.60 | WBS |
| 363.50 | -10.43 | WBS |
| 363.75 | -10.22 | WBS |
| 364.50 | -10.53 | WBS |
| 365.00 | -10.41 | WBS |
| 365.50 | -10.18 | WBS |
| 365.75 | -10.91 | WBS |
| 366.00 | -10.45 | WBS |
| 366.63 | -9.77  | WBS |
| 366.75 | -9.71  | WBS |

|        |        |     |
|--------|--------|-----|
| 367.00 | -9.92  | WBS |
| 369.75 | -10.02 | WBS |
| 370.00 | -10.12 | WBS |
| 370.25 | -9.40  | WBS |
| 371.13 | -9.90  | WBS |
| 371.25 | -9.81  | WBS |
| 371.75 | -10.08 | WBS |
| 372.00 | -10.08 | WBS |
| 372.25 | -9.12  | WBS |
| 372.50 | -9.02  | WBS |
| 372.75 | -8.92  | WBS |
| 373.00 | -9.29  | WBS |
| 373.25 | -10.11 | WBS |
| 376.50 | -9.57  | WBS |
| 376.75 | -10.28 | WBS |
| 377.38 | -9.21  | WBS |
| 377.75 | -9.14  | WBS |
| 378.25 | -8.74  | WBS |
| 379.50 | -10.09 | WBS |
| 381.00 | -9.45  | WBS |
| 381.25 | -7.92  | WBS |
| 382.25 | -9.67  | WBS |
| 382.50 | -9.60  | WBS |
| 382.75 | -9.97  | WBS |
| 386.50 | -9.13  | WBS |
| 388.00 | -10.48 | WBS |
| 389.13 | -10.29 | WBS |
| 389.75 | -10.77 | WBS |
| 390.38 | -10.24 | WBS |
| 390.50 | -8.04  | WBS |
| 391.50 | -9.36  | WBS |
| 392.00 | -8.74  | WBS |
| 392.25 | -9.60  | WBS |
| 394.25 | -10.99 | WBS |
| 395.00 | -9.89  | WBS |
| 396.00 | -9.82  | WBS |
| 396.25 | -10.00 | WBS |
| 396.50 | -10.50 | WBS |
| 396.63 | -10.21 | WBS |
| 397.00 | -10.90 | WBS |



| <b>MCP strat.</b> | <b>Soil B thickness</b> | <b>MAP-soil</b> |
|-------------------|-------------------------|-----------------|
| 130.1             | 1.8                     | 1307            |
| 133.6             | 1                       | 1135            |
| 138.5             | 0.5                     | 1325            |
| 144.2             | 1.7                     | 1274            |
| 148.1             | 2.25                    | 1297            |
| 149               | 1.25                    | 1302            |
| 152.1             | 1.5                     | 1294            |
| 152.2             | 0.75                    | 1185            |
| 156.5             | 0.675                   | 1345            |
| 161.2             | 1.05                    | 1259            |
| 166.5             | 1.05                    | 1298            |
| 168.5             | 0.75                    | 1275            |
| 173.5             | 0.9                     | 975             |
| 177               | 1.15                    | 1214            |
| 179.9             | 1                       | 1284            |
| 182.2             | 1                       | 1304            |
| 189.9             | 2.375                   | 1269            |
| 191.7             | 1                       | 1315            |
| 197.9             | 2                       | 1375            |
| 198.8             | 2.5                     | 1358            |
| 205.1             | 0.55                    | 1367            |
| 210.8             | 1.1                     | 1289            |
| 211.7             | 1.15                    | 1053            |
| 212.2             | 1.65                    | 1304            |
| 212.4             | 1.5                     | 1348            |
| 212.9             | 0.95                    | 1345            |
| 214.4             | 0.8                     | 1274            |
| 217.4             | 1                       | 1273            |
| 218.2             | 1.25                    | 1318            |
| 219.5             | 1.7                     | 1276            |
| 220.2             | 1.4                     | 1279            |
| 223.6             | 1.4                     | 1296            |
| 224.2             | 0.775                   | 1344            |
| 225.4             | 0.75                    | 1091            |
| 227.4             | 1.15                    | 1153            |
| 231.3             | 1.85                    | 1218            |
| 232.2             | 1.45                    | 1284            |
| 234.3             | 0.85                    | 1364            |
| 234.3             | 1.25                    | 1319            |
| 239.1             | 1                       | 1180            |
| 240.9             | 1                       | 1298            |
| 241.1             | 0.75                    | 1266            |
| 246.1             | 1.5                     | 1293            |
| 248               | 1.2                     | 1067            |
| 249.6             | 1.375                   | 1303            |

|       |       |             |
|-------|-------|-------------|
| 249.8 | 1     | <b>1300</b> |
| 251.5 | 0.75  | <b>1306</b> |
| 251.6 | 0.6   | <b>1256</b> |
| 251.9 | 0.75  | <b>1267</b> |
| 252.1 | 0.625 | <b>1286</b> |
| 253.9 | 0.85  | <b>1301</b> |
| 255.3 | 0.85  | <b>1289</b> |
| 257.1 | 0.8   | <b>1233</b> |
| 257.1 | 1.05  | <b>1242</b> |
| 257.8 | 1.4   | <b>1297</b> |
| 259.5 | 1.75  | <b>1266</b> |
| 264.1 | 1     | <b>1288</b> |
| 267.8 | 0.7   | <b>1171</b> |
| 267.8 | 1     | <b>1295</b> |
| 269   | 1     | <b>816</b>  |
| 270.3 | 0.95  | <b>1347</b> |
| 271.5 | 1.15  | <b>1285</b> |
| 272.3 | 1.95  | <b>1280</b> |
| 276.5 | 0.75  | <b>1251</b> |
| 281.8 | 1.5   | <b>1184</b> |
| 298.3 | 1.5   | <b>1295</b> |
| 304.5 | 1.25  | <b>1268</b> |
| 307.3 | 1.25  | <b>1358</b> |
| 309   | 1.25  | <b>962</b>  |
| 314   | 1     | <b>1250</b> |
| 319   | 2     | <b>1244</b> |
| 331   | 2.5   | <b>1313</b> |
| 334.3 | 0.9   | <b>1317</b> |
| 335.5 | 0.9   | <b>1306</b> |
| 340.8 | 1.5   | <b>1253</b> |
| 344.5 | 1.5   | <b>1411</b> |
| 348.3 | 1.25  | <b>1304</b> |
| 355.8 | 1.35  | <b>1343</b> |
| 363.3 | 1.45  | <b>1247</b> |
| 366.5 | 1.75  | <b>1298</b> |
| 370.5 | 1.1   | <b>1289</b> |
| 389.3 | 1     | <b>1303</b> |
| 397.3 | 2.1   | <b>1285</b> |
